Correction

# Correction: Activity *In Vivo* of Anti-*Trypanosoma cruzi* Compounds Selected from a High Throughput Screening

The PLOS Neglected Tropical Diseases Staff

The strain of the parasite used in this study appears incorrectly throughout the manuscript. The correct strain should be Brazil strain (Tcl), and not Y strain (Tcll), as described. The corrections and their locations in the paper are outlined below:

In the Methods section, *T. cruzi* and mammalian cells cultures subsection, second paragraph, the correct sentence is: "...and *T. cruzi* Brazil strain expressing the firefly Luciferase gene were kept in culture by infection..."

In the Methods section, Generation and characterization of luciferase-expressing *T. cruzi* trypomastigotes subsection, the correct sentence is: "...*T. cruzi* (Brazil strain) epimastigotes maintained at..."

In the Methods section, Generation and characterization of luciferase-expressing *T. cruzi* trypomastigotes subsection, the correct sentence is: "...monolayers infected with Brazil-luc metacyclic trypomastigotes..."

In the Methods section, *T. cruzi* in vivo inhibition assay subsection, the correct sentence is: "Trypomastigotes forms from transgenic *T. cruzi* Brazil strain expressing firefly Luciferase..."

In the Results section, paragraph 4, the correct sentence is: "We generated a recombinant *T. cruzi* expressing luciferase (Brazil-luc)..."

In the Results section, paragraph 4, the correct sentence is: "...for both WT and Brazil-luc parasites (data not shown) and that Brazil-luc trypomastigotes harvested..."

In the Results section, paragraph 4, the correct sentence is: '...we estimate that these in vivo passaged Brazil-luc parasites were free from..."

In the Discussion section, paragraph 2, the correct sentence is: "...and the Brazil-luc parasite described here..."

In the Discussion section, paragraph 2, the correct sentence is: "...Balb/c mice infected with *T. cruzi* Brazil strain, we are not able to detect parasitemia by manual counting..."

In the Discussion section, paragraph 2, the correct sentence is: "...but inoculation of the same amount of Brazil-luc parasites allows to follow the course of infection (Fig. 4). The stability of the Brazil-luc parasite..."

## Reference

1. Andriani G, Chessler A-DC, Courtemanche G, Burleigh BA, Rodriguez A (2011) Activity *In Vivo* of Anti-*Trypanosoma cruzi* Compounds Selected from a High Throughput Screening. *PLoS Negl Trop Dis* 5(8): e1298. doi:10.1371/journal.pntd.0001298

**Citation:** The PLOS Neglected Tropical Diseases Staff (2014) Correction: Activity *In Vivo* of Anti-*Trypanosoma cruzi* Compounds Selected from a High Throughput Screening. *PLoS Negl Trop Dis* 8(10): e3293. doi:10.1371/journal.pntd.0003293

**Published:** October 7, 2014

**Copyright:** © 2014 The PLOS Neglected Tropical Diseases Staff. This is an open-access article distributed under the terms of the Creative Commons Attribution License, which permits unrestricted use, distribution, and reproduction in any medium, provided the original author and source are credited.

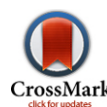

Source: https://journals.plos.org/plosntds/article/file?id=10.1371/journal.pntd.0003293
